# Supplementary material for: Cost-effective and robust genotyping using double-mismatch allele-specific quantitative PCR
Source: PubMed Central journal article supplement (PMC6377641; doi:10.1038/s41598-019-38581-z), 2019-02-15
Supplement: 41598_2019_38581_MOESM1_ESM.pdf [file 41598_2019_38581_MOESM1_ESM.pdf]

## **Cost-effective and robust genotyping using double-mismatch allele-specific quantitative PCR**

Lefever Steve, Rihani Ali, Van der Meulen Joni, Pattyn Filip, Van Maerken Tom, Van Dorpe Jo, Hellemans Jan, Vandesompele Jo

Supplemental Figure 1

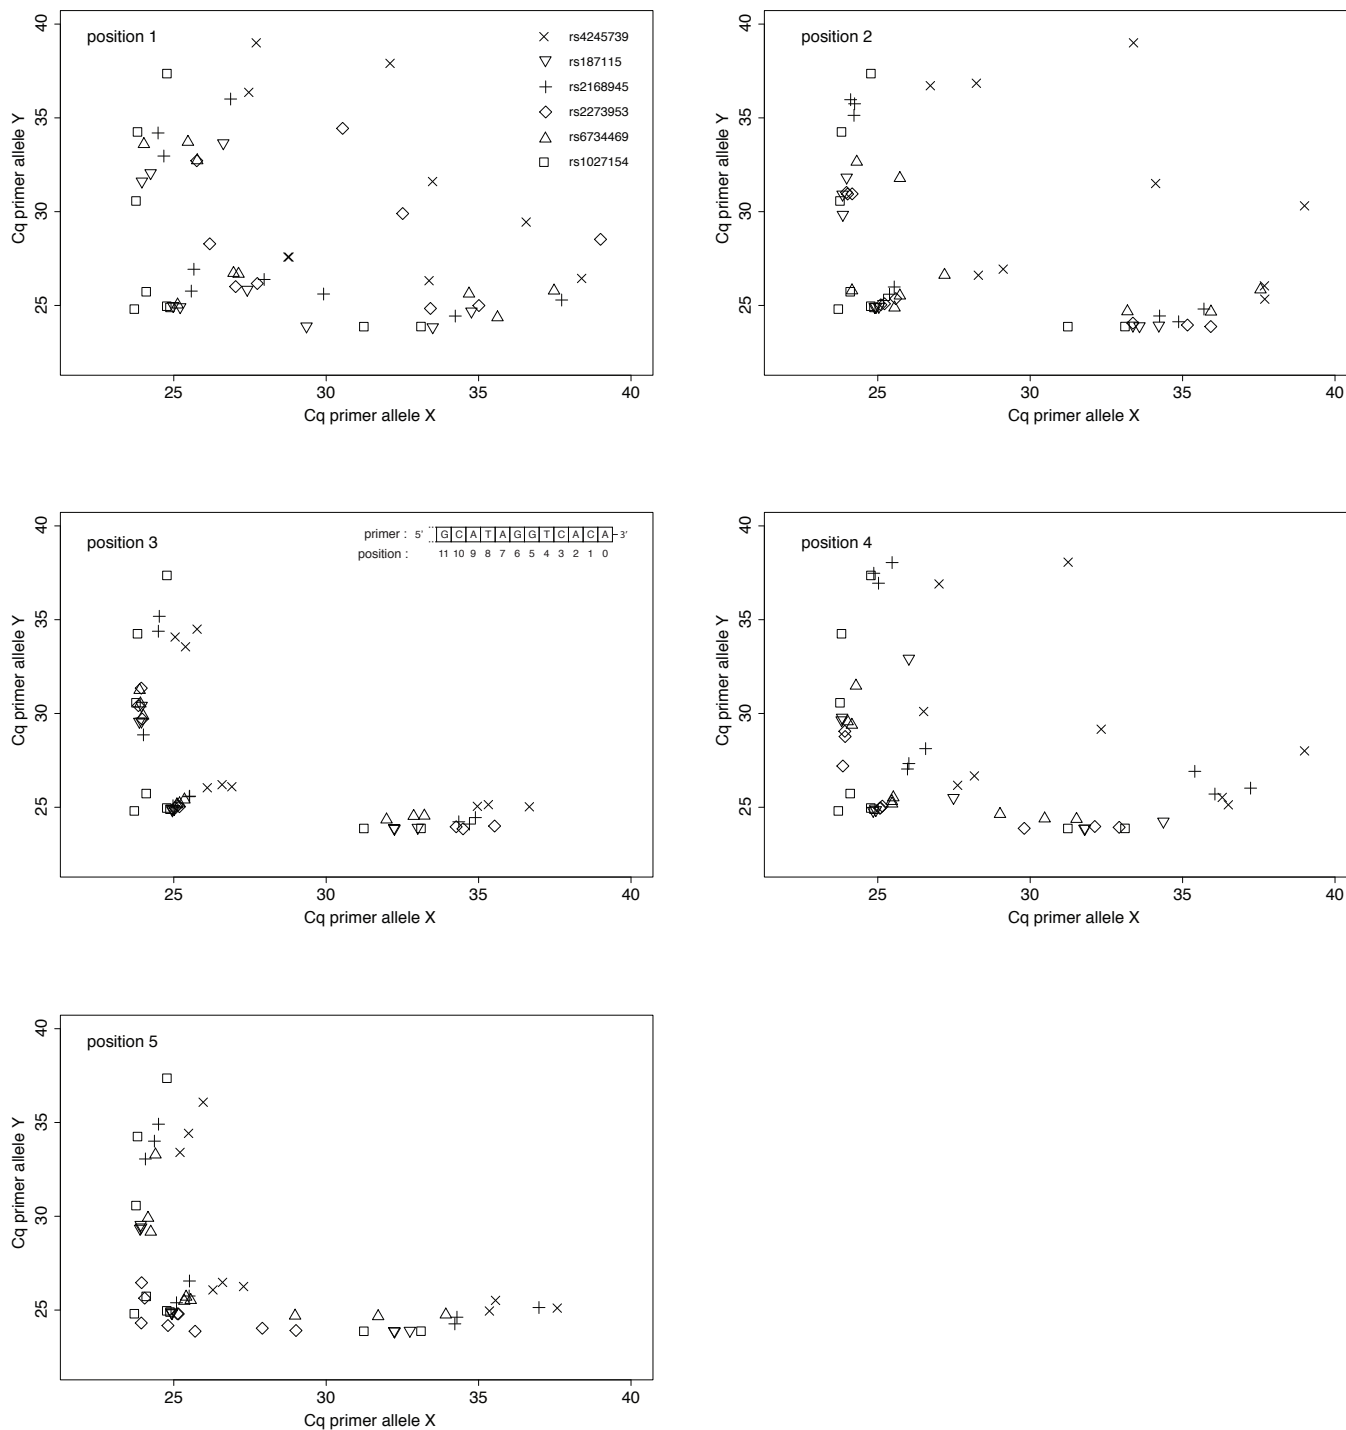

Legend : Two dimensional plot created by plotting the mean Cq values of the two reactions on opposite axes (see Figure 1) – In these plots samples with a heterozygous genotype, having two low Cq values, are grouped in the lower left corner of the plot while homozygous samples appear either in the upper left or lower right corner. The plots above display the results of the 6 SNP assays harboring an artificial mismatch on positions 1 to 5, to identify the optimal artificial mismatch position.

Supplemental Table 1

| SNP       | dCq                |                     |                      | ddCq  |       |
|-----------|--------------------|---------------------|----------------------|-------|-------|
|           | A/B                | A/A                 | B/B                  | AA-AB | BB-AB |
| rs6734469 | 1.89 ( $\pm$ 0.00) | 6.22 ( $\pm$ 4.83)  | -12.83 ( $\pm$ 0.00) | 4.33  | 14.72 |
| rs2273953 | 0.68 ( $\pm$ 0.67) | 1.62 ( $\pm$ 1.68)  | -3.61 ( $\pm$ 0.74)  | 0.95  | 4.29  |
| rs187115  | 0.30 ( $\pm$ 0.20) | 0.10 ( $\pm$ 0.05)  | -0.19 ( $\pm$ 0.00)  | 0.21  | 0.49  |
| rs4245739 | 1.12 ( $\pm$ 0.00) | 1.40 ( $\pm$ 0.00)  | -11.53 ( $\pm$ 1.58) | 0.28  | 12.65 |
| rs1027154 | 0.40 ( $\pm$ 0.00) | 10.73 ( $\pm$ 1.37) | -2.63 ( $\pm$ 0.00)  | 10.33 | 3.03  |
| rs2168945 | 3.79 ( $\pm$ 0.64) | 6.14 ( $\pm$ 0.00)  | -1.39 ( $\pm$ 2.16)  | 2.35  | 5.18  |

Legend : Mean Cq difference (dCq  $\pm$  standard deviation) between the perfect and mismatch reactions – without artificial mismatch – for six SNPs tested on homozygous (A/A and B/B) and heterozygous (A/B) samples, and ddCq values – calculated as the absolute difference between the mean dCq value of the heterozygous samples and the dCq value of homozygous samples – representing the degree in discriminating power.

Supplemental Table 2

| cell line name       | rs4245739 |                     |                 |
|----------------------|-----------|---------------------|-----------------|
|                      | DMAS-qPCR | TaqMan - genotyper  | TaqMan - manual |
| NBL-S                | A/C       | A/C                 | A/C             |
| STA-NB-12            | A/A       | A/A                 | A/A             |
| NB-1                 | A/A       | A/A                 | A/A             |
| SK-N-FI              | A/C       | A/C                 | A/C             |
| CLB-GA               | C/C       | C/C                 | C/C             |
| SKNBE(2c)            | A/A       | A/A                 | A/A             |
| NLF                  | C/C       | C/C                 | C/C             |
| IMR-32               | A/C       | A/C                 | A/C             |
| SK-N-AS              | A/A       | A/A                 | A/A             |
| CHP-134              | A/C       | no calling possible | A/C             |
| CHP-901              | A/A       | A/A                 | A/A             |
| N-206                | A/A       | A/A                 | A/A             |
| SJNB-8               | A/C       | A/C                 | A/C             |
| SJNB-6               | A/A       | A/A                 | A/A             |
| GIMEN                | A/C       | A/C                 | A/C             |
| SH-SY5Y              | A/C       | A/C                 | A/C             |
| SHEP                 | A/C       | A/C                 | A/C             |
| NGP                  | A/C       | A/C                 | A/C             |
| SKNBE                | A/A       | A/A                 | A/A             |
| CHP-902R             | A/C       | A/C                 | A/C             |
| SKNSH                | A/C       | A/C                 | A/C             |
| SJNB-10              | C/C       | C/C                 | C/C             |
| NMB                  | A/C       | no calling possible | A/C             |
| TR-14                | A/A       | A/A                 | A/A             |
| SMS-KCNR             | A/C       | A/C                 | A/C             |
| GICIN-1              | A/C       | A/C                 | A/C             |
| STA-NB-10            | A/C       | A/C                 | A/C             |
| SJNB-12              | A/C       | A/C                 | A/C             |
| SMS-KAN              | A/A       | A/A                 | A/A             |
| LAN-5                | A/C       | A/C                 | A/C             |
| UKF-NB3              | A/C       | A/C                 | A/C             |
| STA-NB-8             | A/A       | A/A                 | A/A             |
| STA-NB-3             | A/C       | A/C                 | A/C             |
| SKMYC2               | A/C       | A/C                 | A/C             |
| STA-NB-9             | A/C       | A/C                 | A/C             |
| SJNB1 (1) 30/04/1999 | A/A       | A/A                 | A/A             |
| LAN-2                | A/A       | A/A                 | A/A             |
| NB-13                | A/A       | A/A                 | A/A             |
| ACN                  | A/A       | A/A                 | A/A             |
| Kelly                | A/A       | A/A                 | A/A             |
| NB-5                 | A/A       | A/A                 | A/A             |
| UHG-NP               | A/A       | A/A                 | A/A             |
| LA-N-6               | A/C       | A/C                 | A/C             |
| CHLA-90              | A/A       | A/A                 | A/A             |
| LA-N-6               | A/C       | A/C                 | A/C             |
| LA-N-1               | A/A       | A/A                 | A/A             |
| SMS-KCN              | A/C       | A/C                 | A/C             |
| UKF-NB-2             | A/C       | A/C                 | A/C             |

| cell line name       | rs2273953 |                     |                     |
|----------------------|-----------|---------------------|---------------------|
|                      | DMAS-qPCR | TaqMan - genotyper  | TaqMan - manual     |
| NBL-S                | G/G       | G/G                 | G/G                 |
| STA-NB-12            | A/A       | A/A                 | A/A                 |
| NB-1                 | G/G       | G/G                 | G/G                 |
| SK-N-FI              | G/G       | G/G                 | G/G                 |
| CLB-GA               | G/G       | G/G                 | G/G                 |
| SKNBE(2c)            | G/G       | G/G                 | G/G                 |
| NLF                  | G/G       | G/G                 | G/G                 |
| IMR-32               | A/A       | A/A                 | A/A                 |
| SK-N-AS              | G/G       | G/G                 | G/G                 |
| CHP-134              | G/G       | G/G                 | G/G                 |
| CHP-901              | G/G       | G/G                 | G/G                 |
| N-206                | G/G       | G/G                 | G/G                 |
| SJNB-8               | G/G       | G/G                 | G/G                 |
| SJNB-6               | G/G       | G/G                 | G/G                 |
| GIMEN                | G/G       | G/G                 | G/G                 |
| SH-SY5Y              | A/G       | no calling possible | A/G                 |
| SHEP                 | A/G       | no calling possible | A/G                 |
| NGP                  | A/G       | G/G                 | G/G                 |
| SKNBE                | G/G       | G/G                 | G/G                 |
| CHP-902R             | G/G       | G/G                 | G/G                 |
| SKNSH                | A/G       | A/G                 | A/G                 |
| SJNB-10              | G/G       | G/G                 | G/G                 |
| NMB                  | G/G       | G/G                 | G/G                 |
| TR-14                | G/G       | G/G                 | G/G                 |
| SMS-KCNR             | A/A       | A/A                 | A/A                 |
| GICIN-1              | G/G       | G/G                 | G/G                 |
| STA-NB-10            | G/G       | G/G                 | G/G                 |
| SJNB-12              | G/G       | G/G                 | G/G                 |
| SMS-KAN              | G/G       | G/G                 | G/G                 |
| LAN-5                | A/A       | A/A                 | A/A                 |
| UKF-NB3              | A/G       | no calling possible | no calling possible |
| STA-NB-8             | G/G       | G/G                 | G/G                 |
| STA-NB-3             | G/G       | G/G                 | G/G                 |
| SKMYC2               | A/G       | A/G                 | A/G                 |
| STA-NB-9             | G/G       | G/G                 | G/G                 |
| SJNB1 (1) 30/04/1999 | G/G       | G/G                 | G/G                 |
| LAN-2                | G/G       | G/G                 | G/G                 |
| NB-13                | G/G       | G/G                 | G/G                 |
| ACN                  | G/G       | G/G                 | G/G                 |
| Kelly                | G/G       | G/G                 | G/G                 |
| NB-5                 | G/G       | G/G                 | G/G                 |
| UHG-NP               | G/G       | G/G                 | G/G                 |
| LA-N-6               | A/A       | A/A                 | A/A                 |
| CHLA-90              | G/G       | G/G                 | G/G                 |
| LA-N-6               | A/A       | A/A                 | A/A                 |
| LA-N-1               | G/G       | G/G                 | G/G                 |
| SMS-KCN              | A/A       | A/A                 | A/A                 |
| UKF-NB-2             | G/G       | G/G                 | G/G                 |

| cell line name       | rs2168945 |                     |                 |
|----------------------|-----------|---------------------|-----------------|
|                      | DMAS-qPCR | TaqMan - genotyper  | TaqMan - manual |
| NBL-S                | C/T       | C/T                 | C/T             |
| STA-NB-12            | T/T       | T/T                 | T/T             |
| NB-1                 | C/T       | C/T                 | C/T             |
| SK-N-FI              | T/T       | T/T                 | T/T             |
| CLB-GA               | C/C       | C/C                 | C/C             |
| SKNBE(2c)            | T/T       | T/T                 | T/T             |
| NLF                  | C/C       | C/C                 | C/C             |
| IMR-32               | C/T       | C/T                 | C/T             |
| SK-N-AS              | C/C       | C/C                 | C/C             |
| CHP-134              | T/T       | T/T                 | T/T             |
| CHP-901              | C/T       | C/T                 | C/T             |
| N-206                | C/T       | C/T                 | C/T             |
| SJNB-8               | T/T       | T/T                 | T/T             |
| SJNB-6               | T/T       | T/T                 | T/T             |
| GIMEN                | C/T       | no calling possible | C/T             |
| SH-SY5Y              | C/T       | C/T                 | C/T             |
| SHEP                 | C/T       | C/T                 | C/T             |
| NGP                  | C/C       | C/C                 | C/C             |
| SKNBE                | T/T       | T/T                 | T/T             |
| CHP-902R             | C/T       | C/T                 | C/T             |
| SKNSH                | C/T       | C/T                 | C/T             |
| SJNB-10              | C/T       | C/T                 | C/T             |
| NMB                  | C/T       | C/T                 | C/T             |
| TR-14                | T/T       | T/T                 | T/T             |
| SMS-KCNR             | C/T       | C/T                 | C/T             |
| GICIN-1              | T/T       | T/T                 | T/T             |
| STA-NB-10            | T/T       | T/T                 | T/T             |
| SJNB-12              | C/C       | C/C                 | C/C             |
| SMS-KAN              | C/T       | C/T                 | C/T             |
| LAN-5                | C/C       | C/C                 | C/C             |
| UKF-NB3              | C/T       | C/T                 | C/T             |
| STA-NB-8             | T/T       | T/T                 | T/T             |
| STA-NB-3             | T/T       | T/T                 | T/T             |
| SKMYC2               | C/T       | C/T                 | C/T             |
| STA-NB-9             | C/T       | C/T                 | C/T             |
| SJNB1 (1) 30/04/1999 | C/T       | no calling possible | C/T             |
| LAN-2                | C/T       | C/T                 | C/T             |
| NB-13                | C/T       | C/T                 | C/T             |
| ACN                  | C/C       | C/C                 | C/C             |
| Kelly                | C/T       | C/T                 | C/T             |
| NB-5                 | C/T       | C/T                 | C/T             |
| UHG-NP               | C/T       | C/T                 | C/T             |
| LA-N-6               | T/T       | no calling possible | T/T             |
| CHLA-90              | C/T       | C/T                 | C/T             |
| LA-N-6               | T/T       | T/T                 | T/T             |
| LA-N-1               | T/T       | T/T                 | T/T             |
| SMS-KCN              | C/T       | C/T                 | C/T             |
| UKF-NB-2             | C/T       | C/T                 | C/T             |

| cell line name       | rs187115  |                     |                     |
|----------------------|-----------|---------------------|---------------------|
|                      | DMAS-qPCR | TaqMan - genotyper  | TaqMan - manual     |
| NBL-5                | A/C       | A/C                 | A/C                 |
| STA-NB-12            | A/A       | no calling possible | no calling possible |
| NB-1                 | A/A       | A/A                 | A/A                 |
| SK-N-FI              | A/C       | A/C                 | A/C                 |
| CLB-GA               | A/A       | A/A                 | A/A                 |
| SKNBE(2c)            | A/A       | A/A                 | A/A                 |
| NLF                  | C/C       | C/C                 | C/C                 |
| IMR-32               | C/C       | C/C                 | C/C                 |
| SK-N-AS              | A/A       | A/A                 | A/A                 |
| CHP-134              | A/C       | A/C                 | A/C                 |
| CHP-901              | A/A       | A/A                 | A/A                 |
| N-206                | A/C       | no calling possible | no calling possible |
| SJNB-8               | A/C       | A/C                 | A/C                 |
| SJNB-6               | A/C       | A/C                 | A/C                 |
| GIMEN                | A/C       | A/C                 | A/C                 |
| SH-SY5Y              | C/C       | C/C                 | C/C                 |
| SHEP                 | C/C       | C/C                 | C/C                 |
| NGP                  | A/C       | A/C                 | A/C                 |
| SKNBE                | A/A       | A/A                 | A/A                 |
| CHP-902R             | A/C       | A/C                 | A/C                 |
| SKNSH                | C/C       | C/C                 | C/C                 |
| SJNB-10              | A/C       | A/C                 | A/C                 |
| NMB                  | A/A       | A/A                 | A/A                 |
| TR-14                | A/A       | A/A                 | A/A                 |
| SMS-KCNR             | A/A       | A/A                 | A/A                 |
| GICIN-1              | C/C       | C/C                 | C/C                 |
| STA-NB-10            | C/C       | C/C                 | C/C                 |
| SJNB-12              | A/A       | A/A                 | A/A                 |
| SMS-KAN              | A/A       | A/A                 | A/A                 |
| LAN-5                | A/C       | A/C                 | A/C                 |
| UKF-NB3              | A/A       | A/A                 | A/A                 |
| STA-NB-8             | A/A       | A/A                 | A/A                 |
| STA-NB-3             | A/C       | no calling possible | no calling possible |
| SKMYC2               | C/C       | C/C                 | C/C                 |
| STA-NB-9             | A/A       | A/A                 | A/A                 |
| SJNB1 (1) 30/04/1999 | A/C       | A/C                 | A/C                 |
| LAN-2                | A/A       | no calling possible | no calling possible |
| NB-13                | C/C       | A/A                 | A/A                 |
| ACN                  | C/C       | C/C                 | C/C                 |
| Kelly                | A/C       | A/C                 | A/C                 |
| NB-5                 | A/C       | A/C                 | A/C                 |
| UHG-NP               | A/A       | A/A                 | A/A                 |
| LA-N-6               | A/C       | A/C                 | A/C                 |
| CHLA-90              | A/A       | A/A                 | A/A                 |
| LA-N-6               | A/C       | A/C                 | A/C                 |
| LA-N-1               | C/C       | C/C                 | C/C                 |
| SMS-KCN              | A/A       | A/A                 | A/A                 |
| UKF-NB-2             | A/C       | no calling possible | A/C                 |

| cell line name       | rs1027154 |                    |                 |
|----------------------|-----------|--------------------|-----------------|
|                      | DMAS-qPCR | TaqMan - genotyper | TaqMan - manual |
| NBL-S                | G/C       | G/C                | G/C             |
| STA-NB-12            | G/C       | G/C                | G/C             |
| NB-1                 | G/G       | G/G                | G/G             |
| SK-N-FI              | G/G       | G/G                | G/G             |
| CLB-GA               | G/G       | G/G                | G/G             |
| SKNBE(2c)            | G/G       | G/G                | G/G             |
| NLF                  | G/C       | G/C                | G/C             |
| IMR-32               | G/G       | G/G                | G/G             |
| SK-N-AS              | G/G       | G/G                | G/G             |
| CHP-134              | G/G       | G/G                | G/G             |
| CHP-901              | G/G       | G/G                | G/G             |
| N-206                | G/C       | G/C                | G/C             |
| SJNB-8               | G/G       | G/G                | G/G             |
| SJNB-6               | G/C       | G/C                | G/C             |
| GIMEN                | G/G       | G/G                | G/G             |
| SH-SY5Y              | G/C       | G/C                | G/C             |
| SHEP                 | G/C       | G/C                | G/C             |
| NGP                  | G/G       | G/G                | G/G             |
| SKNBE                | G/G       | G/G                | G/G             |
| CHP-902R             | G/G       | G/G                | G/G             |
| SKNSH                | G/C       | G/C                | G/C             |
| SJNB-10              | G/G       | G/G                | G/G             |
| NMB                  | G/G       | G/G                | G/G             |
| TR-14                | G/G       | G/G                | G/G             |
| SMS-KCNR             | G/G       | G/G                | G/G             |
| GICIN-1              | G/G       | G/G                | G/G             |
| STA-NB-10            | G/G       | G/G                | G/G             |
| SJNB-12              | G/G       | G/G                | G/G             |
| SMS-KAN              | G/C       | G/C                | G/C             |
| LAN-5                | G/C       | G/C                | G/C             |
| UKF-NB3              | G/G       | G/G                | G/G             |
| STA-NB-8             | G/G       | G/G                | G/G             |
| STA-NB-3             | G/G       | G/G                | G/G             |
| SKMYC2               | G/C       | G/C                | G/C             |
| STA-NB-9             | G/G       | G/G                | G/G             |
| SJNB1 (1) 30/04/1999 | G/G       | G/G                | G/G             |
| LAN-2                | G/C       | G/C                | G/C             |
| NB-13                | G/G       | G/G                | G/G             |
| ACN                  | G/G       | G/G                | G/G             |
| Kelly                | G/C       | G/C                | G/C             |
| NB-5                 | G/G       | G/G                | G/G             |
| UHG-NP               | G/G       | G/G                | G/G             |
| LA-N-6               | G/G       | G/G                | G/G             |
| CHLA-90              | G/C       | G/C                | G/C             |
| LA-N-6               | G/G       | G/G                | G/G             |
| LA-N-1               | G/C       | G/C                | G/C             |
| SMS-KCN              | G/G       | G/G                | G/G             |
| UKF-NB-2             | G/G       | G/G                | G/G             |



| cell line name       | rs6734469 |                     |                     |
|----------------------|-----------|---------------------|---------------------|
|                      | DMAS-qPCR | TaqMan - genotyper  | TaqMan - manual     |
| NBL-S                | A/G       | no calling possible | A/G                 |
| STA-NB-12            | G/G       | G/G                 | G/G                 |
| NB-1                 | G/G       | G/G                 | G/G                 |
| SK-N-FI              | A/A       | no calling possible | no calling possible |
| CLB-GA               | A/G       | A/G                 | A/G                 |
| SKNBE(2c)            | G/G       | G/G                 | G/G                 |
| NLF                  | A/G       | A/G                 | A/G                 |
| IMR-32               | A/A       | A/A                 | A/A                 |
| SK-N-AS              | A/G       | A/G                 | A/G                 |
| CHP-134              | A/G       | A/G                 | A/G                 |
| CHP-901              | A/G       | no calling possible | A/G                 |
| N-206                | A/A       | A/A                 | A/A                 |
| SJNB-8               | G/G       | G/G                 | G/G                 |
| SJNB-6               | A/G       | A/G                 | A/G                 |
| GIMEN                | A/A       | A/A                 | A/A                 |
| SH-SY5Y              | G/G       | G/G                 | G/G                 |
| SHEP                 | G/G       | G/G                 | G/G                 |
| NGP                  | A/G       | no calling possible | A/G                 |
| SKNBE                | G/G       | G/G                 | G/G                 |
| CHP-902R             | A/G       | A/G                 | A/G                 |
| SKNSH                | G/G       | G/G                 | G/G                 |
| SJNB-10              | A/G       | A/G                 | A/G                 |
| NMB                  | A/A       | A/A                 | A/A                 |
| TR-14                | A/G       | no calling possible | A/G                 |
| SMS-KCNR             | A/G       | A/G                 | A/G                 |
| GICIN-1              | A/A       | A/A                 | A/A                 |
| STA-NB-10            | A/A       | A/A                 | A/A                 |
| SJNB-12              | G/G       | G/G                 | G/G                 |
| SMS-KAN              | G/G       | G/G                 | G/G                 |
| LAN-5                | A/G       | A/G                 | A/G                 |
| UKF-NB3              | A/A       | A/A                 | A/A                 |
| STA-NB-8             | G/G       | G/G                 | G/G                 |
| STA-NB-3             | G/G       | G/G                 | G/G                 |
| SKMYC2               | G/G       | G/G                 | G/G                 |
| STA-NB-9             | A/A       | A/A                 | A/A                 |
| SJNB1 (1) 30/04/1999 | A/G       | A/G                 | A/G                 |
| LAN-2                | A/A       | A/A                 | A/A                 |
| NB-13                | A/A       | A/A                 | A/A                 |
| ACN                  | A/A       | A/A                 | A/A                 |
| Kelly                | A/A       | A/A                 | A/A                 |
| NB-5                 | A/A       | A/A                 | A/A                 |
| UHG-NP               | A/G       | no calling possible | A/G                 |
| LA-N-6               | A/G       | A/G                 | A/G                 |
| CHLA-90              | A/G       | A/G                 | A/G                 |
| LA-N-6               | A/G       | A/G                 | A/G                 |
| LA-N-1               | A/G       | A/G                 | A/G                 |
| SMS-KCN              | A/G       | A/G                 | A/G                 |
| UKF-NB-2             | A/G       | A/G                 | A/G                 |

| cell line name       | rs2069347 |                     |                 |
|----------------------|-----------|---------------------|-----------------|
|                      | DMAS-qPCR | TaqMan - genotyper  | TaqMan - manual |
| NBL-S                | C/C       | C/C                 | C/C             |
| STA-NB-12            | C/C       | C/C                 | C/C             |
| NB-1                 | T/T       | T/T                 | T/T             |
| SK-N-FI              | C/T       | C/T                 | C/T             |
| CLB-GA               | C/T       | C/T                 | C/T             |
| SKNBE(2c)            | C/C       | C/C                 | C/C             |
| NLF                  | C/C       | C/C                 | C/C             |
| IMR-32               | C/C       | C/C                 | C/C             |
| SK-N-AS              | C/C       | C/C                 | C/C             |
| CHP-134              | C/T       | C/T                 | C/T             |
| CHP-901              | C/T       | C/T                 | C/T             |
| N-206                | T/T       | T/T                 | T/T             |
| SJNB-8               | C/C       | C/C                 | C/C             |
| SJNB-6               | C/C       | C/C                 | C/C             |
| GIMEN                | C/C       | C/C                 | C/C             |
| SH-SY5Y              | C/T       | C/T                 | C/T             |
| SHEP                 | C/T       | C/T                 | C/T             |
| NGP                  | T/T       | T/T                 | T/T             |
| SKNBE                | C/C       | C/C                 | C/C             |
| CHP-902R             | C/C       | C/C                 | C/C             |
| SKNSH                | C/T       | C/T                 | C/T             |
| SJNB-10              | C/C       | C/C                 | C/C             |
| NMB                  | T/T       | T/T                 | T/T             |
| TR-14                | C/T       | C/T                 | C/T             |
| SMS-KCNR             | C/C       | C/C                 | C/C             |
| GICIN-1              | C/C       | C/C                 | C/C             |
| STA-NB-10            | C/C       | C/C                 | C/C             |
| SJNB-12              | C/T       | C/T                 | C/T             |
| SMS-KAN              | C/T       | C/T                 | C/T             |
| LAN-5                | C/C       | C/C                 | C/C             |
| UKF-NB3              | C/T       | no calling possible | C/T             |
| STA-NB-8             | C/T       | C/T                 | C/T             |
| STA-NB-3             | C/C       | C/C                 | C/C             |
| SKMYC2               | C/T       | C/T                 | C/T             |
| STA-NB-9             | C/C       | C/C                 | C/C             |
| SJNB1 (1) 30/04/1999 | T/T       | T/T                 | T/T             |
| LAN-2                | C/C       | C/C                 | C/C             |
| NB-13                | C/T       | C/T                 | C/T             |
| ACN                  | C/T       | no calling possible | C/T             |
| Kelly                | T/T       | T/T                 | T/T             |
| NB-5                 | C/T       | C/T                 | C/T             |
| UHG-NP               | T/T       | T/T                 | T/T             |
| LA-N-6               | T/T       | T/T                 | T/T             |
| CHLA-90              | C/C       | C/C                 | C/C             |
| LA-N-6               | T/T       | T/T                 | T/T             |
| LA-N-1               | C/T       | C/T                 | C/T             |
| SMS-KCN              | C/C       | C/C                 | C/C             |
| UKF-NB-2             | C/T       | C/C                 | C/T             |

| cell line name       | rs34330   |                     |                 |
|----------------------|-----------|---------------------|-----------------|
|                      | DMAS-qPCR | TaqMan - genotyper  | TaqMan - manual |
| NBL-S                | C/T       | C/T                 | C/T             |
| STA-NB-12            | C/T       | C/T                 | C/T             |
| NB-1                 | T/T       | T/T                 | T/T             |
| SK-N-FI              | C/C       | C/C                 | C/C             |
| CLB-GA               | T/T       | T/T                 | T/T             |
| SKNBE(2c)            | T/T       | T/T                 | T/T             |
| NLF                  | C/T       | C/T                 | C/T             |
| IMR-32               | C/T       | C/T                 | C/T             |
| SK-N-AS              | T/T       | T/T                 | T/T             |
| CHP-134              | C/C       | C/C                 | C/C             |
| CHP-901              | T/T       | T/T                 | T/T             |
| N-206                | T/T       | T/T                 | T/T             |
| SJNB-8               | C/T       | C/T                 | C/T             |
| SJNB-6               | C/T       | C/T                 | C/T             |
| GIMEN                | C/T       | C/T                 | C/T             |
| SH-SY5Y              | C/C       | C/C                 | C/C             |
| SHEP                 | C/C       | C/C                 | C/C             |
| NGP                  | C/C       | C/C                 | C/C             |
| SKNBE                | T/T       | T/T                 | T/T             |
| CHP-902R             | C/C       | C/C                 | C/C             |
| SKNSH                | C/C       | C/C                 | C/C             |
| SJNB-10              | C/T       | C/T                 | C/T             |
| NMB                  | T/T       | T/T                 | T/T             |
| TR-14                | T/T       | T/T                 | T/T             |
| SMS-KCNR             | C/C       | C/C                 | C/C             |
| GICIN-1              | C/C       | C/C                 | C/C             |
| STA-NB-10            | C/T       | C/T                 | C/T             |
| SJNB-12              | C/T       | C/T                 | C/T             |
| SMS-KAN              | C/T       | C/T                 | C/T             |
| LAN-5                | C/T       | C/T                 | C/T             |
| UKF-NB3              | C/C       | C/C                 | C/C             |
| STA-NB-8             | T/T       | T/T                 | T/T             |
| STA-NB-3             | C/T       | no calling possible | C/T             |
| SKMYC2               | C/C       | C/C                 | C/C             |
| STA-NB-9             | C/T       | C/T                 | C/T             |
| SJNB1 (1) 30/04/1999 | C/T       | C/T                 | C/T             |
| LAN-2                | C/C       | C/C                 | C/C             |
| NB-13                | T/T       | T/T                 | T/T             |
| ACN                  | C/C       | C/C                 | C/C             |
| Kelly                | T/T       | T/T                 | T/T             |
| NB-5                 | T/T       | T/T                 | T/T             |
| UHG-NP               | C/C       | C/C                 | C/C             |
| LA-N-6               | T/T       | T/T                 | T/T             |
| CHLA-90              | C/C       | C/C                 | C/C             |
| LA-N-6               | T/T       | T/T                 | T/T             |
| LA-N-1               | C/T       | C/T                 | C/T             |
| SMS-KCN              | C/C       | C/C                 | C/C             |
| UKF-NB-2             | C/T       | T/T                 | C/T             |

| cell line name       | rs2426127 |                    |                 |
|----------------------|-----------|--------------------|-----------------|
|                      | DMAS-qPCR | TaqMan - genotyper | TaqMan - manual |
| NBL-S                | C/C       | C/C                | C/C             |
| STA-NB-12            | C/C       | C/C                | C/C             |
| NB-1                 | T/T       | T/T                | T/T             |
| SK-N-FI              | C/T       | C/T                | C/T             |
| CLB-GA               | C/C       | C/C                | C/C             |
| SKNBE(2c)            | C/C       | C/C                | C/C             |
| NLF                  | C/T       | C/T                | C/T             |
| IMR-32               | C/C       | C/C                | C/C             |
| SK-N-AS              | C/T       | C/T                | C/T             |
| CHP-134              | C/T       | C/T                | C/T             |
| CHP-901              | T/T       | T/T                | T/T             |
| N-206                | C/T       | C/T                | C/T             |
| SJNB-8               | C/T       | C/T                | C/T             |
| SJNB-6               | C/T       | C/T                | C/T             |
| GIMEN                | C/C       | C/C                | C/C             |
| SH-SY5Y              | T/T       | T/T                | T/T             |
| SHEP                 | T/T       | T/T                | T/T             |
| NGP                  | C/C       | C/C                | C/C             |
| SKNBE                | C/C       | C/C                | C/C             |
| CHP-902R             | C/C       | C/C                | C/C             |
| SKNSH                | T/T       | T/T                | T/T             |
| SJNB-10              | C/C       | C/C                | C/C             |
| NMB                  | C/T       | C/T                | C/T             |
| TR-14                | C/T       | C/T                | C/T             |
| SMS-KCNR             | C/C       | C/C                | C/C             |
| GICIN-1              | C/C       | C/C                | C/C             |
| STA-NB-10            | T/T       | T/T                | T/T             |
| SJNB-12              | C/T       | C/T                | C/T             |
| SMS-KAN              | C/T       | C/T                | C/T             |
| LAN-5                | C/T       | C/T                | C/T             |
| UKF-NB3              | C/C       | C/C                | C/C             |
| STA-NB-8             | C/T       | C/T                | C/T             |
| STA-NB-3             | T/T       | T/T                | T/T             |
| SKMYC2               | T/T       | T/T                | T/T             |
| STA-NB-9             | C/C       | C/C                | C/C             |
| SJNB1 (1) 30/04/1999 | C/C       | C/C                | C/C             |
| LAN-2                | C/C       | C/C                | C/C             |
| NB-13                | C/C       | C/C                | C/C             |
| ACN                  | C/C       | C/C                | C/C             |
| Kelly                | C/T       | C/T                | C/T             |
| NB-5                 | C/C       | C/C                | C/C             |
| UHG-NP               | C/C       | C/C                | C/C             |
| LA-N-6               | C/C       | C/C                | C/C             |
| CHLA-90              | C/C       | C/C                | C/C             |
| LA-N-6               | C/C       | C/C                | C/C             |
| LA-N-1               | C/T       | C/T                | C/T             |
| SMS-KCN              | C/C       | C/C                | C/C             |
| UKF-NB-2             | C/C       | C/C                | C/C             |

| cell line name       | rs1800054 |                    |                 |
|----------------------|-----------|--------------------|-----------------|
|                      | DMAS-qPCR | TaqMan - genotyper | TaqMan - manual |
| NBL-S                | C/C       | C/C                | C/C             |
| STA-NB-12            | C/C       | C/C                | C/C             |
| NB-1                 | C/C       | C/C                | C/C             |
| SK-N-FI              | C/C       | C/C                | C/C             |
| CLB-GA               | C/C       | C/C                | C/C             |
| SKNBE(2c)            | C/C       | C/C                | C/C             |
| NLF                  | C/C       | C/C                | C/C             |
| IMR-32               | C/C       | C/C                | C/C             |
| SK-N-AS              | C/C       | C/C                | C/C             |
| CHP-134              | C/C       | C/C                | C/C             |
| CHP-901              | C/C       | C/C                | C/C             |
| N-206                | C/C       | C/C                | C/C             |
| SJNB-8               | C/C       | C/C                | C/C             |
| SJNB-6               | C/C       | C/C                | C/C             |
| GIMEN                | C/C       | C/C                | C/C             |
| SH-SY5Y              | C/C       | C/C                | C/C             |
| SHEP                 | C/C       | C/C                | C/C             |
| NGP                  | C/C       | C/C                | C/C             |
| SKNBE                | C/C       | C/C                | C/C             |
| CHP-902R             | C/C       | C/C                | C/C             |
| SKNSH                | C/C       | C/C                | C/C             |
| SJNB-10              | C/C       | C/C                | C/C             |
| NMB                  | C/C       | C/C                | C/C             |
| TR-14                | C/C       | C/C                | C/C             |
| SMS-KCNR             | C/C       | C/C                | C/C             |
| GICIN-1              | C/C       | C/C                | C/C             |
| STA-NB-10            | C/C       | C/C                | C/C             |
| SJNB-12              | C/C       | C/C                | C/C             |
| SMS-KAN              | C/C       | C/C                | C/C             |
| LAN-5                | C/C       | C/C                | C/C             |
| UKF-NB3              | C/C       | C/C                | C/C             |
| STA-NB-8             | C/C       | C/C                | C/C             |
| STA-NB-3             | C/C       | C/C                | C/C             |
| SKMYC2               | C/C       | C/C                | C/C             |
| STA-NB-9             | C/G       | C/G                | C/G             |
| SJNB1 (1) 30/04/1999 | C/C       | C/C                | C/C             |
| LAN-2                | C/C       | C/C                | C/C             |
| NB-13                | C/C       | C/C                | C/C             |
| ACN                  | C/C       | C/C                | C/C             |
| Kelly                | C/C       | C/C                | C/C             |
| NB-5                 | C/C       | C/C                | C/C             |
| UHG-NP               | C/C       | C/C                | C/C             |
| LA-N-6               | C/C       | C/C                | C/C             |
| CHLA-90              | C/C       | C/C                | C/C             |
| LA-N-6               | C/C       | C/C                | C/C             |
| LA-N-1               | C/C       | C/C                | C/C             |
| SMS-KCN              | C/C       | C/C                | C/C             |
| UKF-NB-2             | C/C       | C/C                | C/C             |

| cell line name       | rs1045485 |                    |                     |
|----------------------|-----------|--------------------|---------------------|
|                      | DMAS-qPCR | TaqMan - genotyper | TaqMan - manual     |
| NBL-S                | G/G       | G/G                | G/G                 |
| STA-NB-12            | G/G       | G/G                | G/G                 |
| NB-1                 | G/G       | G/G                | G/G                 |
| SK-N-FI              | C/G       | C/G                | C/G                 |
| CLB-GA               | C/G       | C/G                | C/G                 |
| SKNBE(2c)            | G/G       | G/G                | G/G                 |
| NLF                  | C/G       | C/G                | C/G                 |
| IMR-32               | G/G       | G/G                | G/G                 |
| SK-N-AS              | G/G       | G/G                | G/G                 |
| CHP-134              | G/G       | G/G                | G/G                 |
| CHP-901              | G/G       | G/G                | G/G                 |
| N-206                | G/G       | G/G                | G/G                 |
| SJNB-8               | G/G       | G/G                | G/G                 |
| SJNB-6               | G/G       | G/G                | G/G                 |
| GIMEN                | G/G       | G/G                | G/G                 |
| SH-SY5Y              | G/G       | G/G                | G/G                 |
| SHEP                 | G/G       | G/G                | G/G                 |
| NGP                  | G/G       | G/G                | G/G                 |
| SKNBE                | G/G       | G/G                | G/G                 |
| CHP-902R             | G/G       | G/G                | G/G                 |
| SKNSH                | G/G       | G/G                | G/G                 |
| SJNB-10              | G/G       | G/G                | G/G                 |
| NMB                  | C/G       | C/G                | C/G                 |
| TR-14                | C/G       | C/G                | C/G                 |
| SMS-KCNR             | C/G       | C/G                | C/G                 |
| GICIN-1              | G/G       | G/G                | G/G                 |
| STA-NB-10            | C/C       | C/C                | C/C                 |
| SJNB-12              | G/G       | G/G                | G/G                 |
| SMS-KAN              | G/G       | G/G                | G/G                 |
| LAN-5                | G/G       | G/G                | G/G                 |
| UKF-NB3              | C/G       | C/G                | C/G                 |
| STA-NB-8             | G/G       | G/G                | G/G                 |
| STA-NB-3             | G/G       | G/G                | G/G                 |
| SKMYC2               | G/G       | G/G                | G/G                 |
| STA-NB-9             | G/G       | G/G                | G/G                 |
| SJNB1 (1) 30/04/1999 | G/G       | G/G                | G/G                 |
| LAN-2                | G/G       | G/G                | G/G                 |
| NB-13                | G/G       | G/G                | G/G                 |
| ACN                  | G/G       | G/G                | G/G                 |
| Kelly                | G/G       | G/G                | G/G                 |
| NB-5                 | G/G       | G/G                | G/G                 |
| UHG-NP               | G/G       | G/G                | G/G                 |
| LA-N-6               | G/G       | G/G                | G/G                 |
| CHLA-90              | G/G       | G/G                | G/G                 |
| LA-N-6               | G/G       | G/G                | G/G                 |
| LA-N-1               | G/G       | G/G                | G/G                 |
| SMS-KCN              | C/G       | C/G                | C/G                 |
| UKF-NB-2             | C/G       | G/G                | no calling possible |

| cell line name       | rs319227  |                     |                 |
|----------------------|-----------|---------------------|-----------------|
|                      | DMAS-qPCR | TaqMan - genotyper  | TaqMan - manual |
| NBL-5                | A/C       | A/C                 | A/C             |
| STA-NB-12            | C/C       | C/C                 | C/C             |
| NB-1                 | A/C       | A/C                 | A/C             |
| SK-N-FI              | C/C       | C/C                 | C/C             |
| CLB-GA               | A/C       | A/C                 | A/C             |
| SKNBE(2c)            | A/C       | A/C                 | A/C             |
| NLF                  | A/A       | A/A                 | A/A             |
| IMR-32               | A/C       | A/C                 | A/C             |
| SK-N-AS              | A/A       | A/A                 | A/A             |
| CHP-134              | C/C       | C/C                 | C/C             |
| CHP-901              | C/C       | C/C                 | C/C             |
| N-206                | A/A       | A/A                 | A/A             |
| SJNB-8               | A/A       | A/A                 | A/A             |
| SJNB-6               | A/C       | A/C                 | A/C             |
| GIMEN                | A/C       | A/C                 | A/C             |
| SH-SY5Y              | A/C       | A/C                 | A/C             |
| SHEP                 | A/C       | A/C                 | A/C             |
| NGP                  | C/C       | C/C                 | C/C             |
| SKNBE                | A/C       | A/C                 | A/C             |
| CHP-902R             | A/C       | A/C                 | A/C             |
| SKNSH                | A/C       | A/C                 | A/C             |
| SJNB-10              | A/C       | A/C                 | A/C             |
| NMB                  | C/C       | C/C                 | C/C             |
| TR-14                | A/C       | no calling possible | A/C             |
| SMS-KCNR             | A/A       | A/A                 | A/A             |
| GICIN-1              | A/C       | A/C                 | A/C             |
| STA-NB-10            | A/A       | A/A                 | A/A             |
| SJNB-12              | A/A       | A/A                 | A/A             |
| SMS-KAN              | A/C       | A/C                 | A/C             |
| LAN-5                | A/A       | A/A                 | A/A             |
| UKF-NB3              | A/A       | A/A                 | A/A             |
| STA-NB-8             | C/C       | C/C                 | C/C             |
| STA-NB-3             | A/A       | A/A                 | A/A             |
| SKMYC2               | A/C       | A/C                 | A/C             |
| STA-NB-9             | A/C       | A/C                 | A/C             |
| SJNB1 (1) 30/04/1999 | A/A       | A/A                 | A/A             |
| LAN-2                | A/A       | A/A                 | A/A             |
| NB-13                | A/C       | A/C                 | A/C             |
| ACN                  | C/C       | C/C                 | C/C             |
| Kelly                | C/C       | A/A                 | A/A             |
| NB-5                 | C/C       | C/C                 | C/C             |
| UHG-NP               | A/C       | A/C                 | A/C             |
| LA-N-6               | C/C       | C/C                 | C/C             |
| CHLA-90              | A/C       | A/C                 | A/C             |
| LA-N-6               | C/C       | C/C                 | C/C             |
| LA-N-1               | A/C       | A/C                 | A/C             |
| SMS-KCN              | A/A       | A/A                 | A/A             |
| UKF-NB-2             | A/C       | A/C                 | A/C             |

Legend : DMAS-qPCR and TaqMan genotype calls for 12 TP53 related SNPs in 48 neuroblastoma cell lines

Supplemental Table 3

| cell line name         | ALK F1174L G>T |                     | included in comparison |
|------------------------|----------------|---------------------|------------------------|
|                        | DMAS-qPCR      | TaqMan              |                        |
| ACN                    | C/C            | no data available   | no                     |
| CHLA-90                | C/C            | no data available   | no                     |
| CHP-134                | C/C            | wt                  | yes                    |
| CHP-901                | C/C            | wt                  | yes                    |
| CHP-902R               | C/C            | wt                  | yes                    |
| CLB-GA                 | C/C            | wt                  | yes                    |
| gDNA                   | C/C            | wt                  | no                     |
| GICIN-1                | C/C            | wt                  | yes                    |
| GIMEN                  | C/C            | wt                  | yes                    |
| IMR-32                 | C/C            | wt                  | yes                    |
| Kelly                  | A/C            | no data available   | no                     |
| LA-N-1                 | A/C            | F1174L              | yes                    |
| LA-N-6 (T10-282)       | C/C            | wt                  | yes                    |
| LA-N-6 (T10-295)       | C/C            | wt                  | yes                    |
| LAN-2                  | C/C            | wt                  | yes                    |
| LAN-5                  | C/C            | wt                  | yes                    |
| N-206                  | A/C            | F1174L              | yes                    |
| NB-1                   | C/C            | wt                  | yes                    |
| NB-13                  | C/C            | wt                  | yes                    |
| NB-5                   | C/C            | wt                  | yes                    |
| NBL-S                  | C/C            | wt                  | yes                    |
| NGP                    | C/C            | wt                  | yes                    |
| NLF                    | C/C            | wt                  | yes                    |
| NMB                    | C/C            | wt                  | yes                    |
| SH-SY5Y                | A/C            | F1174L              | yes                    |
| SHEP                   | A/C            | F1174L              | yes                    |
| SJNB-10                | C/C            | wt                  | yes                    |
| SJNB-12                | C/C            | no data available   | no                     |
| SJNB-6                 | C/C            | wt                  | yes                    |
| SJNB-8                 | C/C            | wt                  | yes                    |
| SJNB1 (1) - 30/04/1999 | C/C            | no calling possible | no                     |
| SK-N-AS                | C/C            | wt                  | yes                    |
| SK-NF-I                | C/C            | wt                  | yes                    |
| SKMYC2                 | A/C            | no data available   | no                     |
| SKNBE                  | C/C            | wt                  | yes                    |
| SKNBE(2c)              | C/C            | wt                  | yes                    |
| SKNSH                  | A/C            | F1174L              | yes                    |
| SMS-KAN                | C/C            | wt                  | yes                    |
| SMS-KCN                | C/C            | no data available   | no                     |
| SMS-KCNR               | A/C            | F1174L              | yes                    |
| STA-NB-10              | C/C            | wt                  | yes                    |
| STA-NB-12              | C/C            | wt                  | yes                    |
| STA-NB-3               | C/C            | wt                  | yes                    |
| STA-NB-8               | C/C            | F1174L              | yes                    |
| STA-NB-9               | C/C            | wt                  | yes                    |
| TR-14                  | C/C            | wt                  | yes                    |
| UHG-NP                 | C/C            | wt                  | yes                    |
| UKF-NB3                | C/C            | wt                  | yes                    |



| cell line name         | ALK R1275Q          |                     | included in comparison |
|------------------------|---------------------|---------------------|------------------------|
|                        | DMAS-qPCR           | TaqMan              |                        |
| ACN                    | C/C                 | no data available   | no                     |
| CHLA-90                | C/C                 | no data available   | no                     |
| CHP-134                | C/C                 | wt                  | yes                    |
| CHP-901                | C/C                 | wt                  | yes                    |
| CHP-902R               | C/C                 | wt                  | yes                    |
| CLB-GA                 | C/T                 | R1275Q              | yes                    |
| gDNA                   | C/C                 | wt                  | no                     |
| GICIN-1                | C/C                 | wt                  | yes                    |
| GIMEN                  | C/C                 | wt                  | yes                    |
| IMR-32                 | C/C                 | wt                  | yes                    |
| Kelly                  | C/C                 | no data available   | no                     |
| LA-N-1                 | C/C                 | wt                  | yes                    |
| LA-N-6 (T10-282)       | C/C                 | wt                  | yes                    |
| LA-N-6 (T10-295)       | C/C                 | wt                  | yes                    |
| LAN-2                  | C/C                 | wt                  | yes                    |
| LAN-5                  | C/T                 | R1275Q              | yes                    |
| N-206                  | C/C                 | wt                  | yes                    |
| NB-1                   | C/C                 | wt                  | yes                    |
| NB-13                  | C/C                 | wt                  | yes                    |
| NB-5                   | C/C                 | wt                  | yes                    |
| NBL-S                  | C/C                 | wt                  | yes                    |
| NGP                    | C/C                 | wt                  | yes                    |
| NLF                    | C/C                 | wt                  | yes                    |
| NMB                    | C/C                 | wt                  | yes                    |
| SH-SY5Y                | C/C                 | wt                  | yes                    |
| SHEP                   | C/C                 | wt                  | yes                    |
| SJNB-10                | C/C                 | wt                  | yes                    |
| SJNB-12                | C/C                 | no data available   | no                     |
| SJNB-6                 | C/C                 | wt                  | yes                    |
| SJNB-8                 | C/C                 | wt                  | yes                    |
| SJNB1 (1) - 30/04/1999 | C/C                 | no calling possible | no                     |
| SK-N-AS                | C/C                 | wt                  | yes                    |
| SK-NF-I                | C/C                 | wt                  | yes                    |
| SKMYC2                 | C/C                 | no data available   | no                     |
| SKNBE                  | C/C                 | wt                  | yes                    |
| SKNBE(2c)              | C/C                 | wt                  | yes                    |
| SKNSH                  | C/C                 | wt                  | yes                    |
| SMS-KAN                | C/C                 | wt                  | yes                    |
| SMS-KCN                | no calling possible | no data available   | no                     |
| SMS-KCNR               | C/C                 | wt                  | yes                    |
| STA-NB-10              | C/C                 | wt                  | yes                    |
| STA-NB-12              | C/C                 | wt                  | yes                    |
| STA-NB-3               | C/C                 | wt                  | yes                    |
| STA-NB-8               | C/C                 | wt                  | yes                    |
| STA-NB-9               | C/C                 | wt                  | yes                    |
| TR-14                  | C/C                 | wt                  | yes                    |
| UHG-NP                 | C/C                 | wt                  | yes                    |
| UKF-NB3                | C/T                 | R1275Q              | yes                    |

Legend : DMAS-qPCR and TaqMan genotype calls for ALK F1174 G>T and R1275Q mutations in 48 neuroblastoma cell lines
